# Supplementary material for: Precision screening facilitates clinical classification of BRCA2-PALB2 binding variants with benign and pathogenic functional effects
Source: JCI journal article supplement (doi:10.1172/jci181879), 2025-04-15
Supplement: sd2 [file 2]

# ICMJE DISCLOSURE FORM

**Date:** 12/27/2024

**Your Name:** Muthiah Bose

**Manuscript Title:** Facilitating clinical classification of variants in the PALB2 binding domain of BRCA2 using CRISPR-Select

**Manuscript Number (if known):** 181879-JCI-CMED-1

In the interest of transparency, we ask you to disclose all relationships/activities/interests listed below that are related to the content of your manuscript. "Related" means any relation with for-profit or not-for-profit third parties whose interests may be affected by the content of the manuscript. Disclosure represents a commitment to transparency and does not necessarily indicate a bias. If you are in doubt about whether to list a relationship/activity/interest, it is preferable that you do so.

The author's relationships/activities/interests should be defined broadly. For example, if your manuscript pertains to the epidemiology of hypertension, you should declare all relationships with manufacturers of antihypertensive medication, even if that medication is not mentioned in the manuscript.

In item #1 below, report all support for the work reported in this manuscript without time limit. For all other items, the time frame for disclosure is the past 36 months.

|                                                           | Name all entities with whom you have this relationship or indicate none (add rows as needed)                                                                                                                                                                                                                                                                                                                                                                                                                                       | Specifications/Comments (e.g., if payments were made to you or to your institution) |
|-----------------------------------------------------------|------------------------------------------------------------------------------------------------------------------------------------------------------------------------------------------------------------------------------------------------------------------------------------------------------------------------------------------------------------------------------------------------------------------------------------------------------------------------------------------------------------------------------------|-------------------------------------------------------------------------------------|
| <b>Time frame: Since the initial planning of the work</b> |                                                                                                                                                                                                                                                                                                                                                                                                                                                                                                                                    |                                                                                     |
| <b>1</b>                                                  | <div> <div>All support for the present manuscript (e.g., funding, provision of study materials, medical writing, article processing charges, etc.)<br/><b>No time limit for this item.</b></div> <div> <input type="checkbox"/> None <div> <div>Danish Cancer Society</div> <div>Grant number J.nr: R269-A15884. To support the development of functional assays for the classification of VUS identified in homologous recombination repair genes</div> <div>Click the tab key to add additional rows.</div> </div> </div> </div> |                                                                                     |
| <b>Time frame: past 36 months</b>                         |                                                                                                                                                                                                                                                                                                                                                                                                                                                                                                                                    |                                                                                     |
| <b>2</b>                                                  | <div> <div>Grants or contracts from any entity (if not indicated in item #1 above).</div> <div> <input checked="" type="checkbox"/> None </div> </div>                                                                                                                                                                                                                                                                                                                                                                             |                                                                                     |
| <b>3</b>                                                  | <div> <div>Royalties or licenses</div> <div> <input checked="" type="checkbox"/> None </div> </div>                                                                                                                                                                                                                                                                                                                                                                                                                                |                                                                                     |

|    |                                                                                                              | Name all entities with whom you have this relationship or indicate none (add rows as needed)                                                                                                   | Specifications/Comments (e.g., if payments were made to you or to your institution) |  |  |  |  |  |  |  |  |
|----|--------------------------------------------------------------------------------------------------------------|------------------------------------------------------------------------------------------------------------------------------------------------------------------------------------------------|-------------------------------------------------------------------------------------|--|--|--|--|--|--|--|--|
| 4  | Consulting fees                                                                                              | <input checked="" type="checkbox"/> <b>None</b><br><table border="1"> <tr><td></td><td></td></tr> <tr><td></td><td></td></tr> <tr><td></td><td></td></tr> <tr><td></td><td></td></tr> </table> |                                                                                     |  |  |  |  |  |  |  |  |
|    |                                                                                                              |                                                                                                                                                                                                |                                                                                     |  |  |  |  |  |  |  |  |
|    |                                                                                                              |                                                                                                                                                                                                |                                                                                     |  |  |  |  |  |  |  |  |
|    |                                                                                                              |                                                                                                                                                                                                |                                                                                     |  |  |  |  |  |  |  |  |
|    |                                                                                                              |                                                                                                                                                                                                |                                                                                     |  |  |  |  |  |  |  |  |
| 5  | Payment or honoraria for lectures, presentations, speakers bureaus, manuscript writing or educational events | <input checked="" type="checkbox"/> <b>None</b><br><table border="1"> <tr><td></td><td></td></tr> <tr><td></td><td></td></tr> <tr><td></td><td></td></tr> </table>                             |                                                                                     |  |  |  |  |  |  |  |  |
|    |                                                                                                              |                                                                                                                                                                                                |                                                                                     |  |  |  |  |  |  |  |  |
|    |                                                                                                              |                                                                                                                                                                                                |                                                                                     |  |  |  |  |  |  |  |  |
|    |                                                                                                              |                                                                                                                                                                                                |                                                                                     |  |  |  |  |  |  |  |  |
| 6  | Payment for expert testimony                                                                                 | <input checked="" type="checkbox"/> <b>None</b><br><table border="1"> <tr><td></td><td></td></tr> <tr><td></td><td></td></tr> <tr><td></td><td></td></tr> </table>                             |                                                                                     |  |  |  |  |  |  |  |  |
|    |                                                                                                              |                                                                                                                                                                                                |                                                                                     |  |  |  |  |  |  |  |  |
|    |                                                                                                              |                                                                                                                                                                                                |                                                                                     |  |  |  |  |  |  |  |  |
|    |                                                                                                              |                                                                                                                                                                                                |                                                                                     |  |  |  |  |  |  |  |  |
| 7  | Support for attending meetings and/or travel                                                                 | <input checked="" type="checkbox"/> <b>None</b><br><table border="1"> <tr><td></td><td></td></tr> <tr><td></td><td></td></tr> <tr><td></td><td></td></tr> </table>                             |                                                                                     |  |  |  |  |  |  |  |  |
|    |                                                                                                              |                                                                                                                                                                                                |                                                                                     |  |  |  |  |  |  |  |  |
|    |                                                                                                              |                                                                                                                                                                                                |                                                                                     |  |  |  |  |  |  |  |  |
|    |                                                                                                              |                                                                                                                                                                                                |                                                                                     |  |  |  |  |  |  |  |  |
| 8  | Patents planned, issued or pending                                                                           | <input checked="" type="checkbox"/> <b>None</b><br><table border="1"> <tr><td></td><td></td></tr> <tr><td></td><td></td></tr> <tr><td></td><td></td></tr> </table>                             |                                                                                     |  |  |  |  |  |  |  |  |
|    |                                                                                                              |                                                                                                                                                                                                |                                                                                     |  |  |  |  |  |  |  |  |
|    |                                                                                                              |                                                                                                                                                                                                |                                                                                     |  |  |  |  |  |  |  |  |
|    |                                                                                                              |                                                                                                                                                                                                |                                                                                     |  |  |  |  |  |  |  |  |
| 9  | Participation on a Data Safety Monitoring Board or Advisory Board                                            | <input checked="" type="checkbox"/> <b>None</b><br><table border="1"> <tr><td></td><td></td></tr> <tr><td></td><td></td></tr> <tr><td></td><td></td></tr> </table>                             |                                                                                     |  |  |  |  |  |  |  |  |
|    |                                                                                                              |                                                                                                                                                                                                |                                                                                     |  |  |  |  |  |  |  |  |
|    |                                                                                                              |                                                                                                                                                                                                |                                                                                     |  |  |  |  |  |  |  |  |
|    |                                                                                                              |                                                                                                                                                                                                |                                                                                     |  |  |  |  |  |  |  |  |
| 10 | Leadership or fiduciary role in other board, society, committee or advocacy group, paid or unpaid            | <input checked="" type="checkbox"/> <b>None</b><br><table border="1"> <tr><td></td><td></td></tr> <tr><td></td><td></td></tr> <tr><td></td><td></td></tr> </table>                             |                                                                                     |  |  |  |  |  |  |  |  |
|    |                                                                                                              |                                                                                                                                                                                                |                                                                                     |  |  |  |  |  |  |  |  |
|    |                                                                                                              |                                                                                                                                                                                                |                                                                                     |  |  |  |  |  |  |  |  |
|    |                                                                                                              |                                                                                                                                                                                                |                                                                                     |  |  |  |  |  |  |  |  |

|           |                                                                                  | Name all entities with whom you have this relationship or indicate none (add rows as needed)                                                                                                          | Specifications/Comments (e.g., if payments were made to you or to your institution) |  |  |  |  |  |  |
|-----------|----------------------------------------------------------------------------------|-------------------------------------------------------------------------------------------------------------------------------------------------------------------------------------------------------|-------------------------------------------------------------------------------------|--|--|--|--|--|--|
| <b>11</b> | Stock or stock options                                                           | <input checked="" type="checkbox"/> <b>None</b> <table border="1" style="width: 100%; margin-top: 5px;"> <tr><td></td><td></td></tr> <tr><td></td><td></td></tr> <tr><td></td><td></td></tr> </table> |                                                                                     |  |  |  |  |  |  |
|           |                                                                                  |                                                                                                                                                                                                       |                                                                                     |  |  |  |  |  |  |
|           |                                                                                  |                                                                                                                                                                                                       |                                                                                     |  |  |  |  |  |  |
|           |                                                                                  |                                                                                                                                                                                                       |                                                                                     |  |  |  |  |  |  |
| <b>12</b> | Receipt of equipment, materials, drugs, medical writing, gifts or other services | <input checked="" type="checkbox"/> <b>None</b> <table border="1" style="width: 100%; margin-top: 5px;"> <tr><td></td><td></td></tr> <tr><td></td><td></td></tr> <tr><td></td><td></td></tr> </table> |                                                                                     |  |  |  |  |  |  |
|           |                                                                                  |                                                                                                                                                                                                       |                                                                                     |  |  |  |  |  |  |
|           |                                                                                  |                                                                                                                                                                                                       |                                                                                     |  |  |  |  |  |  |
|           |                                                                                  |                                                                                                                                                                                                       |                                                                                     |  |  |  |  |  |  |
| <b>13</b> | Other financial or non-financial interests                                       | <input checked="" type="checkbox"/> <b>None</b> <table border="1" style="width: 100%; margin-top: 5px;"> <tr><td></td><td></td></tr> <tr><td></td><td></td></tr> <tr><td></td><td></td></tr> </table> |                                                                                     |  |  |  |  |  |  |
|           |                                                                                  |                                                                                                                                                                                                       |                                                                                     |  |  |  |  |  |  |
|           |                                                                                  |                                                                                                                                                                                                       |                                                                                     |  |  |  |  |  |  |
|           |                                                                                  |                                                                                                                                                                                                       |                                                                                     |  |  |  |  |  |  |

**Please place an "X" next to the following statement to indicate your agreement:**

☒ I certify that I have answered every question and have not altered the wording of any of the questions on this form.

# ICMJE DISCLOSURE FORM

**Date:** 12/27/2024

**Your Name:** Manika Indrajit Singh

**Manuscript Title:** Facilitating clinical classification of variants in the PALB2 binding domain of BRCA2 using CRISPR-Select

**Manuscript Number (if known):** 181879-JCI-CMED-1

In the interest of transparency, we ask you to disclose all relationships/activities/interests listed below that are related to the content of your manuscript. "Related" means any relation with for-profit or not-for-profit third parties whose interests may be affected by the content of the manuscript. Disclosure represents a commitment to transparency and does not necessarily indicate a bias. If you are in doubt about whether to list a relationship/activity/interest, it is preferable that you do so.

The author's relationships/activities/interests should be defined broadly. For example, if your manuscript pertains to the epidemiology of hypertension, you should declare all relationships with manufacturers of antihypertensive medication, even if that medication is not mentioned in the manuscript.

In item #1 below, report all support for the work reported in this manuscript without time limit. For all other items, the time frame for disclosure is the past 36 months.

|                                                           | Name all entities with whom you have this relationship or indicate none (add rows as needed)                                                                                                                                                                                                                                                                | Specifications/Comments (e.g., if payments were made to you or to your institution) |                                                                                                             |  |  |  |                                           |  |
|-----------------------------------------------------------|-------------------------------------------------------------------------------------------------------------------------------------------------------------------------------------------------------------------------------------------------------------------------------------------------------------------------------------------------------------|-------------------------------------------------------------------------------------|-------------------------------------------------------------------------------------------------------------|--|--|--|-------------------------------------------|--|
| <b>Time frame: Since the initial planning of the work</b> |                                                                                                                                                                                                                                                                                                                                                             |                                                                                     |                                                                                                             |  |  |  |                                           |  |
| <b>1</b>                                                  | <div> <input type="checkbox"/> None </div> <div> <table border="1"> <tr> <td>Novo Nordisk Foundation</td> <td>Grant number J.nr: NNF21OC0072287. To facilitate the identification of novel hereditary breast cancer genes</td> </tr> <tr> <td></td> <td></td> </tr> <tr> <td></td> <td>Click the tab key to add additional rows.</td> </tr> </table> </div> | Novo Nordisk Foundation                                                             | Grant number J.nr: NNF21OC0072287. To facilitate the identification of novel hereditary breast cancer genes |  |  |  | Click the tab key to add additional rows. |  |
| Novo Nordisk Foundation                                   | Grant number J.nr: NNF21OC0072287. To facilitate the identification of novel hereditary breast cancer genes                                                                                                                                                                                                                                                 |                                                                                     |                                                                                                             |  |  |  |                                           |  |
|                                                           |                                                                                                                                                                                                                                                                                                                                                             |                                                                                     |                                                                                                             |  |  |  |                                           |  |
|                                                           | Click the tab key to add additional rows.                                                                                                                                                                                                                                                                                                                   |                                                                                     |                                                                                                             |  |  |  |                                           |  |
| <b>Time frame: past 36 months</b>                         |                                                                                                                                                                                                                                                                                                                                                             |                                                                                     |                                                                                                             |  |  |  |                                           |  |
| <b>2</b>                                                  | <div> <input checked="" type="checkbox"/> None </div> <div> <table border="1"> <tr> <td></td> <td></td> </tr> <tr> <td></td> <td></td> </tr> <tr> <td></td> <td></td> </tr> </table> </div>                                                                                                                                                                 |                                                                                     |                                                                                                             |  |  |  |                                           |  |
|                                                           |                                                                                                                                                                                                                                                                                                                                                             |                                                                                     |                                                                                                             |  |  |  |                                           |  |
|                                                           |                                                                                                                                                                                                                                                                                                                                                             |                                                                                     |                                                                                                             |  |  |  |                                           |  |
|                                                           |                                                                                                                                                                                                                                                                                                                                                             |                                                                                     |                                                                                                             |  |  |  |                                           |  |
| <b>3</b>                                                  | <div> <input checked="" type="checkbox"/> None </div> <div> <table border="1"> <tr> <td></td> <td></td> </tr> <tr> <td></td> <td></td> </tr> <tr> <td></td> <td></td> </tr> </table> </div>                                                                                                                                                                 |                                                                                     |                                                                                                             |  |  |  |                                           |  |
|                                                           |                                                                                                                                                                                                                                                                                                                                                             |                                                                                     |                                                                                                             |  |  |  |                                           |  |
|                                                           |                                                                                                                                                                                                                                                                                                                                                             |                                                                                     |                                                                                                             |  |  |  |                                           |  |
|                                                           |                                                                                                                                                                                                                                                                                                                                                             |                                                                                     |                                                                                                             |  |  |  |                                           |  |

|    |                                                                                                              | Name all entities with whom you have this relationship or indicate none (add rows as needed)                                                                                                   | Specifications/Comments (e.g., if payments were made to you or to your institution) |  |  |  |  |  |  |  |  |
|----|--------------------------------------------------------------------------------------------------------------|------------------------------------------------------------------------------------------------------------------------------------------------------------------------------------------------|-------------------------------------------------------------------------------------|--|--|--|--|--|--|--|--|
| 4  | Consulting fees                                                                                              | <input checked="" type="checkbox"/> <b>None</b><br><table border="1"> <tr><td></td><td></td></tr> <tr><td></td><td></td></tr> <tr><td></td><td></td></tr> <tr><td></td><td></td></tr> </table> |                                                                                     |  |  |  |  |  |  |  |  |
|    |                                                                                                              |                                                                                                                                                                                                |                                                                                     |  |  |  |  |  |  |  |  |
|    |                                                                                                              |                                                                                                                                                                                                |                                                                                     |  |  |  |  |  |  |  |  |
|    |                                                                                                              |                                                                                                                                                                                                |                                                                                     |  |  |  |  |  |  |  |  |
|    |                                                                                                              |                                                                                                                                                                                                |                                                                                     |  |  |  |  |  |  |  |  |
| 5  | Payment or honoraria for lectures, presentations, speakers bureaus, manuscript writing or educational events | <input checked="" type="checkbox"/> <b>None</b><br><table border="1"> <tr><td></td><td></td></tr> <tr><td></td><td></td></tr> <tr><td></td><td></td></tr> </table>                             |                                                                                     |  |  |  |  |  |  |  |  |
|    |                                                                                                              |                                                                                                                                                                                                |                                                                                     |  |  |  |  |  |  |  |  |
|    |                                                                                                              |                                                                                                                                                                                                |                                                                                     |  |  |  |  |  |  |  |  |
|    |                                                                                                              |                                                                                                                                                                                                |                                                                                     |  |  |  |  |  |  |  |  |
| 6  | Payment for expert testimony                                                                                 | <input checked="" type="checkbox"/> <b>None</b><br><table border="1"> <tr><td></td><td></td></tr> <tr><td></td><td></td></tr> <tr><td></td><td></td></tr> </table>                             |                                                                                     |  |  |  |  |  |  |  |  |
|    |                                                                                                              |                                                                                                                                                                                                |                                                                                     |  |  |  |  |  |  |  |  |
|    |                                                                                                              |                                                                                                                                                                                                |                                                                                     |  |  |  |  |  |  |  |  |
|    |                                                                                                              |                                                                                                                                                                                                |                                                                                     |  |  |  |  |  |  |  |  |
| 7  | Support for attending meetings and/or travel                                                                 | <input checked="" type="checkbox"/> <b>None</b><br><table border="1"> <tr><td></td><td></td></tr> <tr><td></td><td></td></tr> <tr><td></td><td></td></tr> </table>                             |                                                                                     |  |  |  |  |  |  |  |  |
|    |                                                                                                              |                                                                                                                                                                                                |                                                                                     |  |  |  |  |  |  |  |  |
|    |                                                                                                              |                                                                                                                                                                                                |                                                                                     |  |  |  |  |  |  |  |  |
|    |                                                                                                              |                                                                                                                                                                                                |                                                                                     |  |  |  |  |  |  |  |  |
| 8  | Patents planned, issued or pending                                                                           | <input checked="" type="checkbox"/> <b>None</b><br><table border="1"> <tr><td></td><td></td></tr> <tr><td></td><td></td></tr> <tr><td></td><td></td></tr> </table>                             |                                                                                     |  |  |  |  |  |  |  |  |
|    |                                                                                                              |                                                                                                                                                                                                |                                                                                     |  |  |  |  |  |  |  |  |
|    |                                                                                                              |                                                                                                                                                                                                |                                                                                     |  |  |  |  |  |  |  |  |
|    |                                                                                                              |                                                                                                                                                                                                |                                                                                     |  |  |  |  |  |  |  |  |
| 9  | Participation on a Data Safety Monitoring Board or Advisory Board                                            | <input checked="" type="checkbox"/> <b>None</b><br><table border="1"> <tr><td></td><td></td></tr> <tr><td></td><td></td></tr> <tr><td></td><td></td></tr> </table>                             |                                                                                     |  |  |  |  |  |  |  |  |
|    |                                                                                                              |                                                                                                                                                                                                |                                                                                     |  |  |  |  |  |  |  |  |
|    |                                                                                                              |                                                                                                                                                                                                |                                                                                     |  |  |  |  |  |  |  |  |
|    |                                                                                                              |                                                                                                                                                                                                |                                                                                     |  |  |  |  |  |  |  |  |
| 10 | Leadership or fiduciary role in other board, society, committee or advocacy group, paid or unpaid            | <input checked="" type="checkbox"/> <b>None</b><br><table border="1"> <tr><td></td><td></td></tr> <tr><td></td><td></td></tr> <tr><td></td><td></td></tr> </table>                             |                                                                                     |  |  |  |  |  |  |  |  |
|    |                                                                                                              |                                                                                                                                                                                                |                                                                                     |  |  |  |  |  |  |  |  |
|    |                                                                                                              |                                                                                                                                                                                                |                                                                                     |  |  |  |  |  |  |  |  |
|    |                                                                                                              |                                                                                                                                                                                                |                                                                                     |  |  |  |  |  |  |  |  |

|           |                                                                                  | Name all entities with whom you have this relationship or indicate none (add rows as needed)                                                                       | Specifications/Comments (e.g., if payments were made to you or to your institution) |  |  |  |  |  |  |
|-----------|----------------------------------------------------------------------------------|--------------------------------------------------------------------------------------------------------------------------------------------------------------------|-------------------------------------------------------------------------------------|--|--|--|--|--|--|
| <b>11</b> | Stock or stock options                                                           | <input checked="" type="checkbox"/> <b>None</b><br><table border="1"> <tr><td></td><td></td></tr> <tr><td></td><td></td></tr> <tr><td></td><td></td></tr> </table> |                                                                                     |  |  |  |  |  |  |
|           |                                                                                  |                                                                                                                                                                    |                                                                                     |  |  |  |  |  |  |
|           |                                                                                  |                                                                                                                                                                    |                                                                                     |  |  |  |  |  |  |
|           |                                                                                  |                                                                                                                                                                    |                                                                                     |  |  |  |  |  |  |
| <b>12</b> | Receipt of equipment, materials, drugs, medical writing, gifts or other services | <input checked="" type="checkbox"/> <b>None</b><br><table border="1"> <tr><td></td><td></td></tr> <tr><td></td><td></td></tr> <tr><td></td><td></td></tr> </table> |                                                                                     |  |  |  |  |  |  |
|           |                                                                                  |                                                                                                                                                                    |                                                                                     |  |  |  |  |  |  |
|           |                                                                                  |                                                                                                                                                                    |                                                                                     |  |  |  |  |  |  |
|           |                                                                                  |                                                                                                                                                                    |                                                                                     |  |  |  |  |  |  |
| <b>13</b> | Other financial or non-financial interests                                       | <input checked="" type="checkbox"/> <b>None</b><br><table border="1"> <tr><td></td><td></td></tr> <tr><td></td><td></td></tr> <tr><td></td><td></td></tr> </table> |                                                                                     |  |  |  |  |  |  |
|           |                                                                                  |                                                                                                                                                                    |                                                                                     |  |  |  |  |  |  |
|           |                                                                                  |                                                                                                                                                                    |                                                                                     |  |  |  |  |  |  |
|           |                                                                                  |                                                                                                                                                                    |                                                                                     |  |  |  |  |  |  |

**Please place an "X" next to the following statement to indicate your agreement:**

☒ I certify that I have answered every question and have not altered the wording of any of the questions on this form.

# ICMJE DISCLOSURE FORM

**Date:** 8/12/2024

**Your Name:** Morten Frödin

**Manuscript Title:** Facilitating clinical classification of variants in the PALB2 binding domain of BRCA2 using CRISPR-Select

**Manuscript Number (if known):** 181879-JCI-CMED-1

In the interest of transparency, we ask you to disclose all relationships/activities/interests listed below that are related to the content of your manuscript. "Related" means any relation with for-profit or not-for-profit third parties whose interests may be affected by the content of the manuscript. Disclosure represents a commitment to transparency and does not necessarily indicate a bias. If you are in doubt about whether to list a relationship/activity/interest, it is preferable that you do so.

The author's relationships/activities/interests should be defined broadly. For example, if your manuscript pertains to the epidemiology of hypertension, you should declare all relationships with manufacturers of antihypertensive medication, even if that medication is not mentioned in the manuscript.

In item #1 below, report all support for the work reported in this manuscript without time limit. For all other items, the time frame for disclosure is the past 36 months.

|                                                           | Name all entities with whom you have this relationship or indicate none (add rows as needed)                                                                                   | Specifications/Comments (e.g., if payments were made to you or to your institution)                                                                                                                                                                                                                                                                               |                                              |                                                                                                              |  |  |  |                                           |
|-----------------------------------------------------------|--------------------------------------------------------------------------------------------------------------------------------------------------------------------------------|-------------------------------------------------------------------------------------------------------------------------------------------------------------------------------------------------------------------------------------------------------------------------------------------------------------------------------------------------------------------|----------------------------------------------|--------------------------------------------------------------------------------------------------------------|--|--|--|-------------------------------------------|
| <b>Time frame: Since the initial planning of the work</b> |                                                                                                                                                                                |                                                                                                                                                                                                                                                                                                                                                                   |                                              |                                                                                                              |  |  |  |                                           |
| <b>1</b>                                                  | All support for the present manuscript (e.g., funding, provision of study materials, medical writing, article processing charges, etc.)<br><b>No time limit for this item.</b> | <input type="checkbox"/> <b>None</b><br><table border="1"> <tr> <td>Sygeforsikringen Danmark (Danish Foundation)</td> <td>Grant number J.nr: 2021-0339. This is to support the development of functional assays to classify BRCA2 VUS.</td> </tr> <tr> <td></td> <td></td> </tr> <tr> <td></td> <td>Click the tab key to add additional rows.</td> </tr> </table> | Sygeforsikringen Danmark (Danish Foundation) | Grant number J.nr: 2021-0339. This is to support the development of functional assays to classify BRCA2 VUS. |  |  |  | Click the tab key to add additional rows. |
| Sygeforsikringen Danmark (Danish Foundation)              | Grant number J.nr: 2021-0339. This is to support the development of functional assays to classify BRCA2 VUS.                                                                   |                                                                                                                                                                                                                                                                                                                                                                   |                                              |                                                                                                              |  |  |  |                                           |
|                                                           |                                                                                                                                                                                |                                                                                                                                                                                                                                                                                                                                                                   |                                              |                                                                                                              |  |  |  |                                           |
|                                                           | Click the tab key to add additional rows.                                                                                                                                      |                                                                                                                                                                                                                                                                                                                                                                   |                                              |                                                                                                              |  |  |  |                                           |
| <b>Time frame: past 36 months</b>                         |                                                                                                                                                                                |                                                                                                                                                                                                                                                                                                                                                                   |                                              |                                                                                                              |  |  |  |                                           |
| <b>2</b>                                                  | Grants or contracts from any entity (if not indicated in item #1 above).                                                                                                       | <input checked="" type="checkbox"/> <b>None</b><br><table border="1"> <tr> <td></td> <td></td> </tr> <tr> <td></td> <td></td> </tr> <tr> <td></td> <td></td> </tr> </table>                                                                                                                                                                                       |                                              |                                                                                                              |  |  |  |                                           |
|                                                           |                                                                                                                                                                                |                                                                                                                                                                                                                                                                                                                                                                   |                                              |                                                                                                              |  |  |  |                                           |
|                                                           |                                                                                                                                                                                |                                                                                                                                                                                                                                                                                                                                                                   |                                              |                                                                                                              |  |  |  |                                           |
|                                                           |                                                                                                                                                                                |                                                                                                                                                                                                                                                                                                                                                                   |                                              |                                                                                                              |  |  |  |                                           |
| <b>3</b>                                                  | Royalties or licenses                                                                                                                                                          | <input checked="" type="checkbox"/> <b>None</b><br><table border="1"> <tr> <td></td> <td></td> </tr> <tr> <td></td> <td></td> </tr> <tr> <td></td> <td></td> </tr> </table>                                                                                                                                                                                       |                                              |                                                                                                              |  |  |  |                                           |
|                                                           |                                                                                                                                                                                |                                                                                                                                                                                                                                                                                                                                                                   |                                              |                                                                                                              |  |  |  |                                           |
|                                                           |                                                                                                                                                                                |                                                                                                                                                                                                                                                                                                                                                                   |                                              |                                                                                                              |  |  |  |                                           |
|                                                           |                                                                                                                                                                                |                                                                                                                                                                                                                                                                                                                                                                   |                                              |                                                                                                              |  |  |  |                                           |

|                                                                                                                                         |                                                                                                                                        | Name all entities with whom you have this relationship or indicate none (add rows as needed)                                                                                                                                                                                                                                                                                                                                            | Specifications/Comments (e.g., if payments were made to you or to your institution) |                                                                                                                                         |                                                                                                                                        |  |  |  |  |  |  |
|-----------------------------------------------------------------------------------------------------------------------------------------|----------------------------------------------------------------------------------------------------------------------------------------|-----------------------------------------------------------------------------------------------------------------------------------------------------------------------------------------------------------------------------------------------------------------------------------------------------------------------------------------------------------------------------------------------------------------------------------------|-------------------------------------------------------------------------------------|-----------------------------------------------------------------------------------------------------------------------------------------|----------------------------------------------------------------------------------------------------------------------------------------|--|--|--|--|--|--|
| 4                                                                                                                                       | Consulting fees                                                                                                                        | <input checked="" type="checkbox"/> <b>None</b><br><table border="1"> <tr><td></td><td></td></tr> <tr><td></td><td></td></tr> <tr><td></td><td></td></tr> <tr><td></td><td></td></tr> </table>                                                                                                                                                                                                                                          |                                                                                     |                                                                                                                                         |                                                                                                                                        |  |  |  |  |  |  |
|                                                                                                                                         |                                                                                                                                        |                                                                                                                                                                                                                                                                                                                                                                                                                                         |                                                                                     |                                                                                                                                         |                                                                                                                                        |  |  |  |  |  |  |
|                                                                                                                                         |                                                                                                                                        |                                                                                                                                                                                                                                                                                                                                                                                                                                         |                                                                                     |                                                                                                                                         |                                                                                                                                        |  |  |  |  |  |  |
|                                                                                                                                         |                                                                                                                                        |                                                                                                                                                                                                                                                                                                                                                                                                                                         |                                                                                     |                                                                                                                                         |                                                                                                                                        |  |  |  |  |  |  |
|                                                                                                                                         |                                                                                                                                        |                                                                                                                                                                                                                                                                                                                                                                                                                                         |                                                                                     |                                                                                                                                         |                                                                                                                                        |  |  |  |  |  |  |
| 5                                                                                                                                       | Payment or honoraria for lectures, presentations, speakers bureaus, manuscript writing or educational events                           | <input checked="" type="checkbox"/> <b>None</b><br><table border="1"> <tr><td></td><td></td></tr> <tr><td></td><td></td></tr> <tr><td></td><td></td></tr> </table>                                                                                                                                                                                                                                                                      |                                                                                     |                                                                                                                                         |                                                                                                                                        |  |  |  |  |  |  |
|                                                                                                                                         |                                                                                                                                        |                                                                                                                                                                                                                                                                                                                                                                                                                                         |                                                                                     |                                                                                                                                         |                                                                                                                                        |  |  |  |  |  |  |
|                                                                                                                                         |                                                                                                                                        |                                                                                                                                                                                                                                                                                                                                                                                                                                         |                                                                                     |                                                                                                                                         |                                                                                                                                        |  |  |  |  |  |  |
|                                                                                                                                         |                                                                                                                                        |                                                                                                                                                                                                                                                                                                                                                                                                                                         |                                                                                     |                                                                                                                                         |                                                                                                                                        |  |  |  |  |  |  |
| 6                                                                                                                                       | Payment for expert testimony                                                                                                           | <input checked="" type="checkbox"/> <b>None</b><br><table border="1"> <tr><td></td><td></td></tr> <tr><td></td><td></td></tr> <tr><td></td><td></td></tr> </table>                                                                                                                                                                                                                                                                      |                                                                                     |                                                                                                                                         |                                                                                                                                        |  |  |  |  |  |  |
|                                                                                                                                         |                                                                                                                                        |                                                                                                                                                                                                                                                                                                                                                                                                                                         |                                                                                     |                                                                                                                                         |                                                                                                                                        |  |  |  |  |  |  |
|                                                                                                                                         |                                                                                                                                        |                                                                                                                                                                                                                                                                                                                                                                                                                                         |                                                                                     |                                                                                                                                         |                                                                                                                                        |  |  |  |  |  |  |
|                                                                                                                                         |                                                                                                                                        |                                                                                                                                                                                                                                                                                                                                                                                                                                         |                                                                                     |                                                                                                                                         |                                                                                                                                        |  |  |  |  |  |  |
| 7                                                                                                                                       | Support for attending meetings and/or travel                                                                                           | <input checked="" type="checkbox"/> <b>None</b><br><table border="1"> <tr><td></td><td></td></tr> <tr><td></td><td></td></tr> <tr><td></td><td></td></tr> </table>                                                                                                                                                                                                                                                                      |                                                                                     |                                                                                                                                         |                                                                                                                                        |  |  |  |  |  |  |
|                                                                                                                                         |                                                                                                                                        |                                                                                                                                                                                                                                                                                                                                                                                                                                         |                                                                                     |                                                                                                                                         |                                                                                                                                        |  |  |  |  |  |  |
|                                                                                                                                         |                                                                                                                                        |                                                                                                                                                                                                                                                                                                                                                                                                                                         |                                                                                     |                                                                                                                                         |                                                                                                                                        |  |  |  |  |  |  |
|                                                                                                                                         |                                                                                                                                        |                                                                                                                                                                                                                                                                                                                                                                                                                                         |                                                                                     |                                                                                                                                         |                                                                                                                                        |  |  |  |  |  |  |
| 8                                                                                                                                       | Patents planned, issued or pending                                                                                                     | <input type="checkbox"/> <b>None</b><br><table border="1"> <tr> <td>I am part of the European patent application on "CRISPR-Select" (application no. 21816113.1) submitted by the University of Copenhagen.</td> <td>The patent is owned by the University of Copenhagen and it has been licensed to BioPhenyx (where I am co-founder and 33% shareholder).</td> </tr> <tr><td></td><td></td></tr> <tr><td></td><td></td></tr> </table> |                                                                                     | I am part of the European patent application on "CRISPR-Select" (application no. 21816113.1) submitted by the University of Copenhagen. | The patent is owned by the University of Copenhagen and it has been licensed to BioPhenyx (where I am co-founder and 33% shareholder). |  |  |  |  |  |  |
| I am part of the European patent application on "CRISPR-Select" (application no. 21816113.1) submitted by the University of Copenhagen. | The patent is owned by the University of Copenhagen and it has been licensed to BioPhenyx (where I am co-founder and 33% shareholder). |                                                                                                                                                                                                                                                                                                                                                                                                                                         |                                                                                     |                                                                                                                                         |                                                                                                                                        |  |  |  |  |  |  |
|                                                                                                                                         |                                                                                                                                        |                                                                                                                                                                                                                                                                                                                                                                                                                                         |                                                                                     |                                                                                                                                         |                                                                                                                                        |  |  |  |  |  |  |
|                                                                                                                                         |                                                                                                                                        |                                                                                                                                                                                                                                                                                                                                                                                                                                         |                                                                                     |                                                                                                                                         |                                                                                                                                        |  |  |  |  |  |  |
| 9                                                                                                                                       | Participation on a Data Safety Monitoring Board or Advisory Board                                                                      | <input checked="" type="checkbox"/> <b>None</b><br><table border="1"> <tr><td></td><td></td></tr> <tr><td></td><td></td></tr> <tr><td></td><td></td></tr> </table>                                                                                                                                                                                                                                                                      |                                                                                     |                                                                                                                                         |                                                                                                                                        |  |  |  |  |  |  |
|                                                                                                                                         |                                                                                                                                        |                                                                                                                                                                                                                                                                                                                                                                                                                                         |                                                                                     |                                                                                                                                         |                                                                                                                                        |  |  |  |  |  |  |
|                                                                                                                                         |                                                                                                                                        |                                                                                                                                                                                                                                                                                                                                                                                                                                         |                                                                                     |                                                                                                                                         |                                                                                                                                        |  |  |  |  |  |  |
|                                                                                                                                         |                                                                                                                                        |                                                                                                                                                                                                                                                                                                                                                                                                                                         |                                                                                     |                                                                                                                                         |                                                                                                                                        |  |  |  |  |  |  |
| 10                                                                                                                                      | Leadership or fiduciary role in other board, society, committee or advocacy group, paid or unpaid                                      | <input type="checkbox"/> <b>None</b><br><table border="1"> <tr><td></td><td></td></tr> <tr><td></td><td></td></tr> <tr><td></td><td></td></tr> </table>                                                                                                                                                                                                                                                                                 |                                                                                     |                                                                                                                                         |                                                                                                                                        |  |  |  |  |  |  |
|                                                                                                                                         |                                                                                                                                        |                                                                                                                                                                                                                                                                                                                                                                                                                                         |                                                                                     |                                                                                                                                         |                                                                                                                                        |  |  |  |  |  |  |
|                                                                                                                                         |                                                                                                                                        |                                                                                                                                                                                                                                                                                                                                                                                                                                         |                                                                                     |                                                                                                                                         |                                                                                                                                        |  |  |  |  |  |  |
|                                                                                                                                         |                                                                                                                                        |                                                                                                                                                                                                                                                                                                                                                                                                                                         |                                                                                     |                                                                                                                                         |                                                                                                                                        |  |  |  |  |  |  |



|                                                                                                                                                                                                                                                               |                                                                                  | Name all entities with whom you have this relationship or indicate none (add rows as needed) | Specifications/Comments (e.g., if payments were made to you or to your institution)                                                                                                                                                                                                                                                    |
|---------------------------------------------------------------------------------------------------------------------------------------------------------------------------------------------------------------------------------------------------------------|----------------------------------------------------------------------------------|----------------------------------------------------------------------------------------------|----------------------------------------------------------------------------------------------------------------------------------------------------------------------------------------------------------------------------------------------------------------------------------------------------------------------------------------|
| 11                                                                                                                                                                                                                                                            | Stock or stock options                                                           | <input type="checkbox"/> <b>None</b>                                                         |                                                                                                                                                                                                                                                                                                                                        |
|                                                                                                                                                                                                                                                               |                                                                                  | BioPhenyx Aps. Danish Company Registration number: 42954810                                  | I co-founded the company that uses CRISPR-Select to serve customers in the private sector (Pharma and Biotech) with CRISPR-Select. I (and my department, BRIC) have never received payments from the company. The company does not provide diagnostic services or decode cancer-related variants for private and healthcare customers. |
|                                                                                                                                                                                                                                                               |                                                                                  |                                                                                              |                                                                                                                                                                                                                                                                                                                                        |
|                                                                                                                                                                                                                                                               |                                                                                  |                                                                                              |                                                                                                                                                                                                                                                                                                                                        |
| 12                                                                                                                                                                                                                                                            | Receipt of equipment, materials, drugs, medical writing, gifts or other services | <input checked="" type="checkbox"/> <b>None</b>                                              |                                                                                                                                                                                                                                                                                                                                        |
|                                                                                                                                                                                                                                                               |                                                                                  |                                                                                              |                                                                                                                                                                                                                                                                                                                                        |
|                                                                                                                                                                                                                                                               |                                                                                  |                                                                                              |                                                                                                                                                                                                                                                                                                                                        |
|                                                                                                                                                                                                                                                               |                                                                                  |                                                                                              |                                                                                                                                                                                                                                                                                                                                        |
| 13                                                                                                                                                                                                                                                            | Other financial or non-financial interests                                       | <input checked="" type="checkbox"/> <b>None</b>                                              |                                                                                                                                                                                                                                                                                                                                        |
|                                                                                                                                                                                                                                                               |                                                                                  |                                                                                              |                                                                                                                                                                                                                                                                                                                                        |
|                                                                                                                                                                                                                                                               |                                                                                  |                                                                                              |                                                                                                                                                                                                                                                                                                                                        |
|                                                                                                                                                                                                                                                               |                                                                                  |                                                                                              |                                                                                                                                                                                                                                                                                                                                        |
| <p><b>Please place an "X" next to the following statement to indicate your agreement:</b></p> <p><input checked="" type="checkbox"/> I certify that I have answered every question and have not altered the wording of any of the questions on this form.</p> |                                                                                  |                                                                                              |                                                                                                                                                                                                                                                                                                                                        |

## ICMJE DISCLOSURE FORM

**Date:** 12/27/2024

**Your Name:** Bent Ejlersen

**Manuscript Title:** Facilitating clinical classification of variants in the PALB2 binding domain of BRCA2 using CRISPR-Select

**Manuscript Number (if known):** 181879-JCI-CMED-1

In the interest of transparency, we ask you to disclose all relationships/activities/interests listed below that are related to the content of your manuscript. "Related" means any relation with for-profit or not-for-profit third parties whose interests may be affected by the content of the manuscript. Disclosure represents a commitment to transparency and does not necessarily indicate a bias. If you are in doubt about whether to list a relationship/activity/interest, it is preferable that you do so.

The author's relationships/activities/interests should be defined broadly. For example, if your manuscript pertains to the epidemiology of hypertension, you should declare all relationships with manufacturers of antihypertensive medication, even if that medication is not mentioned in the manuscript.

In item #1 below, report all support for the work reported in this manuscript without time limit. For all other items, the time frame for disclosure is the past 36 months.

|                                                    | Name all entities with whom you have this relationship or indicate none (add rows as needed)                                                                                   | Specifications/Comments (e.g., if payments were made to you or to your institution)                                                                                                                                                                                                                                                                                                                                                                                                                                                                                                                                                                                                                                                                                                                                                                                                                                                          |       |                                        |          |                                        |        |                                           |             |                                        |     |                                        |                            |                                        |
|----------------------------------------------------|--------------------------------------------------------------------------------------------------------------------------------------------------------------------------------|----------------------------------------------------------------------------------------------------------------------------------------------------------------------------------------------------------------------------------------------------------------------------------------------------------------------------------------------------------------------------------------------------------------------------------------------------------------------------------------------------------------------------------------------------------------------------------------------------------------------------------------------------------------------------------------------------------------------------------------------------------------------------------------------------------------------------------------------------------------------------------------------------------------------------------------------|-------|----------------------------------------|----------|----------------------------------------|--------|-------------------------------------------|-------------|----------------------------------------|-----|----------------------------------------|----------------------------|----------------------------------------|
| Time frame: Since the initial planning of the work |                                                                                                                                                                                |                                                                                                                                                                                                                                                                                                                                                                                                                                                                                                                                                                                                                                                                                                                                                                                                                                                                                                                                              |       |                                        |          |                                        |        |                                           |             |                                        |     |                                        |                            |                                        |
| <b>1</b>                                           | All support for the present manuscript (e.g., funding, provision of study materials, medical writing, article processing charges, etc.)<br><b>No time limit for this item.</b> | <div style="border: 1px solid black; padding: 5px;"> <input checked="" type="checkbox"/> <b>None</b> </div> <table border="1" style="width: 100%; border-collapse: collapse; margin-top: 5px;"> <tr><td style="height: 20px;"></td><td style="height: 20px;"></td></tr> <tr><td style="height: 20px;"></td><td style="height: 20px;"></td></tr> <tr><td style="height: 20px;"></td><td style="height: 20px; text-align: center;">Click the tab key to add additional rows.</td></tr> </table>                                                                                                                                                                                                                                                                                                                                                                                                                                                |       |                                        |          |                                        |        | Click the tab key to add additional rows. |             |                                        |     |                                        |                            |                                        |
|                                                    |                                                                                                                                                                                |                                                                                                                                                                                                                                                                                                                                                                                                                                                                                                                                                                                                                                                                                                                                                                                                                                                                                                                                              |       |                                        |          |                                        |        |                                           |             |                                        |     |                                        |                            |                                        |
|                                                    |                                                                                                                                                                                |                                                                                                                                                                                                                                                                                                                                                                                                                                                                                                                                                                                                                                                                                                                                                                                                                                                                                                                                              |       |                                        |          |                                        |        |                                           |             |                                        |     |                                        |                            |                                        |
|                                                    | Click the tab key to add additional rows.                                                                                                                                      |                                                                                                                                                                                                                                                                                                                                                                                                                                                                                                                                                                                                                                                                                                                                                                                                                                                                                                                                              |       |                                        |          |                                        |        |                                           |             |                                        |     |                                        |                            |                                        |
| Time frame: past 36 months                         |                                                                                                                                                                                |                                                                                                                                                                                                                                                                                                                                                                                                                                                                                                                                                                                                                                                                                                                                                                                                                                                                                                                                              |       |                                        |          |                                        |        |                                           |             |                                        |     |                                        |                            |                                        |
| <b>2</b>                                           | Grants or contracts from any entity (if not indicated in item #1 above).                                                                                                       | <div style="border: 1px solid black; padding: 5px;"> <input type="checkbox"/> <b>None</b> </div> <table border="1" style="width: 100%; border-collapse: collapse; margin-top: 5px;"> <tr><td style="height: 20px;">Roche</td><td style="height: 20px;">Research Funding (Paid to institution)</td></tr> <tr><td style="height: 20px;">Novartis</td><td style="height: 20px;">Research Funding (Paid to institution)</td></tr> <tr><td style="height: 20px;">Pfizer</td><td style="height: 20px;">Research Funding (Paid to institution)</td></tr> <tr><td style="height: 20px;">AstraZeneca</td><td style="height: 20px;">Research Funding (Paid to institution)</td></tr> <tr><td style="height: 20px;">MSD</td><td style="height: 20px;">Research Funding (Paid to institution)</td></tr> <tr><td style="height: 20px;">Daiichi Sankyo Europe GmbH</td><td style="height: 20px;">Research Funding (Paid to institution)</td></tr> </table> | Roche | Research Funding (Paid to institution) | Novartis | Research Funding (Paid to institution) | Pfizer | Research Funding (Paid to institution)    | AstraZeneca | Research Funding (Paid to institution) | MSD | Research Funding (Paid to institution) | Daiichi Sankyo Europe GmbH | Research Funding (Paid to institution) |
| Roche                                              | Research Funding (Paid to institution)                                                                                                                                         |                                                                                                                                                                                                                                                                                                                                                                                                                                                                                                                                                                                                                                                                                                                                                                                                                                                                                                                                              |       |                                        |          |                                        |        |                                           |             |                                        |     |                                        |                            |                                        |
| Novartis                                           | Research Funding (Paid to institution)                                                                                                                                         |                                                                                                                                                                                                                                                                                                                                                                                                                                                                                                                                                                                                                                                                                                                                                                                                                                                                                                                                              |       |                                        |          |                                        |        |                                           |             |                                        |     |                                        |                            |                                        |
| Pfizer                                             | Research Funding (Paid to institution)                                                                                                                                         |                                                                                                                                                                                                                                                                                                                                                                                                                                                                                                                                                                                                                                                                                                                                                                                                                                                                                                                                              |       |                                        |          |                                        |        |                                           |             |                                        |     |                                        |                            |                                        |
| AstraZeneca                                        | Research Funding (Paid to institution)                                                                                                                                         |                                                                                                                                                                                                                                                                                                                                                                                                                                                                                                                                                                                                                                                                                                                                                                                                                                                                                                                                              |       |                                        |          |                                        |        |                                           |             |                                        |     |                                        |                            |                                        |
| MSD                                                | Research Funding (Paid to institution)                                                                                                                                         |                                                                                                                                                                                                                                                                                                                                                                                                                                                                                                                                                                                                                                                                                                                                                                                                                                                                                                                                              |       |                                        |          |                                        |        |                                           |             |                                        |     |                                        |                            |                                        |
| Daiichi Sankyo Europe GmbH                         | Research Funding (Paid to institution)                                                                                                                                         |                                                                                                                                                                                                                                                                                                                                                                                                                                                                                                                                                                                                                                                                                                                                                                                                                                                                                                                                              |       |                                        |          |                                        |        |                                           |             |                                        |     |                                        |                            |                                        |

|                            |                                                                                                              | Name all entities with whom you have this relationship or indicate none (add rows as needed)                                                                                                                                                                                                  | Specifications/Comments (e.g., if payments were made to you or to your institution) |                |             |                |     |                |                            |                |  |
|----------------------------|--------------------------------------------------------------------------------------------------------------|-----------------------------------------------------------------------------------------------------------------------------------------------------------------------------------------------------------------------------------------------------------------------------------------------|-------------------------------------------------------------------------------------|----------------|-------------|----------------|-----|----------------|----------------------------|----------------|--|
| 3                          | Royalties or licenses                                                                                        | <input checked="" type="checkbox"/> None<br><table border="1"> <tr><td></td><td></td></tr> <tr><td></td><td></td></tr> <tr><td></td><td></td></tr> </table>                                                                                                                                   |                                                                                     |                |             |                |     |                |                            |                |  |
|                            |                                                                                                              |                                                                                                                                                                                                                                                                                               |                                                                                     |                |             |                |     |                |                            |                |  |
|                            |                                                                                                              |                                                                                                                                                                                                                                                                                               |                                                                                     |                |             |                |     |                |                            |                |  |
|                            |                                                                                                              |                                                                                                                                                                                                                                                                                               |                                                                                     |                |             |                |     |                |                            |                |  |
| 4                          | Consulting fees                                                                                              | <input type="checkbox"/> None<br><table border="1"> <tr> <td>Lilly</td> <td>(Paid to self)</td> </tr> <tr><td></td><td></td></tr> <tr><td></td><td></td></tr> <tr><td></td><td></td></tr> </table>                                                                                            | Lilly                                                                               | (Paid to self) |             |                |     |                |                            |                |  |
| Lilly                      | (Paid to self)                                                                                               |                                                                                                                                                                                                                                                                                               |                                                                                     |                |             |                |     |                |                            |                |  |
|                            |                                                                                                              |                                                                                                                                                                                                                                                                                               |                                                                                     |                |             |                |     |                |                            |                |  |
|                            |                                                                                                              |                                                                                                                                                                                                                                                                                               |                                                                                     |                |             |                |     |                |                            |                |  |
|                            |                                                                                                              |                                                                                                                                                                                                                                                                                               |                                                                                     |                |             |                |     |                |                            |                |  |
| 5                          | Payment or honoraria for lectures, presentations, speakers bureaus, manuscript writing or educational events | <input checked="" type="checkbox"/> None<br><table border="1"> <tr><td></td><td></td></tr> <tr><td></td><td></td></tr> <tr><td></td><td></td></tr> </table>                                                                                                                                   |                                                                                     |                |             |                |     |                |                            |                |  |
|                            |                                                                                                              |                                                                                                                                                                                                                                                                                               |                                                                                     |                |             |                |     |                |                            |                |  |
|                            |                                                                                                              |                                                                                                                                                                                                                                                                                               |                                                                                     |                |             |                |     |                |                            |                |  |
|                            |                                                                                                              |                                                                                                                                                                                                                                                                                               |                                                                                     |                |             |                |     |                |                            |                |  |
| 6                          | Payment for expert testimony                                                                                 | <input checked="" type="checkbox"/> None<br><table border="1"> <tr><td></td><td></td></tr> <tr><td></td><td></td></tr> <tr><td></td><td></td></tr> </table>                                                                                                                                   |                                                                                     |                |             |                |     |                |                            |                |  |
|                            |                                                                                                              |                                                                                                                                                                                                                                                                                               |                                                                                     |                |             |                |     |                |                            |                |  |
|                            |                                                                                                              |                                                                                                                                                                                                                                                                                               |                                                                                     |                |             |                |     |                |                            |                |  |
|                            |                                                                                                              |                                                                                                                                                                                                                                                                                               |                                                                                     |                |             |                |     |                |                            |                |  |
| 7                          | Support for attending meetings and/or travel                                                                 | <input type="checkbox"/> None<br><table border="1"> <tr> <td>Roche</td> <td>(Paid to self)</td> </tr> <tr> <td>AstraZeneca</td> <td>(Paid to self)</td> </tr> <tr> <td>MSD</td> <td>(Paid to self)</td> </tr> <tr> <td>Daiichi Sankyo Europe GmbH</td> <td>(Paid to self)</td> </tr> </table> | Roche                                                                               | (Paid to self) | AstraZeneca | (Paid to self) | MSD | (Paid to self) | Daiichi Sankyo Europe GmbH | (Paid to self) |  |
| Roche                      | (Paid to self)                                                                                               |                                                                                                                                                                                                                                                                                               |                                                                                     |                |             |                |     |                |                            |                |  |
| AstraZeneca                | (Paid to self)                                                                                               |                                                                                                                                                                                                                                                                                               |                                                                                     |                |             |                |     |                |                            |                |  |
| MSD                        | (Paid to self)                                                                                               |                                                                                                                                                                                                                                                                                               |                                                                                     |                |             |                |     |                |                            |                |  |
| Daiichi Sankyo Europe GmbH | (Paid to self)                                                                                               |                                                                                                                                                                                                                                                                                               |                                                                                     |                |             |                |     |                |                            |                |  |
| 8                          | Patents planned, issued or pending                                                                           | <input checked="" type="checkbox"/> None<br><table border="1"> <tr><td></td><td></td></tr> <tr><td></td><td></td></tr> <tr><td></td><td></td></tr> </table>                                                                                                                                   |                                                                                     |                |             |                |     |                |                            |                |  |
|                            |                                                                                                              |                                                                                                                                                                                                                                                                                               |                                                                                     |                |             |                |     |                |                            |                |  |
|                            |                                                                                                              |                                                                                                                                                                                                                                                                                               |                                                                                     |                |             |                |     |                |                            |                |  |
|                            |                                                                                                              |                                                                                                                                                                                                                                                                                               |                                                                                     |                |             |                |     |                |                            |                |  |
| 9                          | Participation on a Data Safety Monitoring Board or Advisory Board                                            | <input checked="" type="checkbox"/> None<br><table border="1"> <tr><td></td><td></td></tr> <tr><td></td><td></td></tr> <tr><td></td><td></td></tr> </table>                                                                                                                                   |                                                                                     |                |             |                |     |                |                            |                |  |
|                            |                                                                                                              |                                                                                                                                                                                                                                                                                               |                                                                                     |                |             |                |     |                |                            |                |  |
|                            |                                                                                                              |                                                                                                                                                                                                                                                                                               |                                                                                     |                |             |                |     |                |                            |                |  |
|                            |                                                                                                              |                                                                                                                                                                                                                                                                                               |                                                                                     |                |             |                |     |                |                            |                |  |
| 10                         | Leadership or fiduciary role in other board,                                                                 | <input checked="" type="checkbox"/> None<br><table border="1"> <tr><td></td><td></td></tr> </table>                                                                                                                                                                                           |                                                                                     |                |             |                |     |                |                            |                |  |
|                            |                                                                                                              |                                                                                                                                                                                                                                                                                               |                                                                                     |                |             |                |     |                |                            |                |  |

|    |                                                                                  | Name all entities with whom you have this relationship or indicate none (add rows as needed)                                                             | Specifications/Comments (e.g., if payments were made to you or to your institution) |  |  |  |  |  |  |
|----|----------------------------------------------------------------------------------|----------------------------------------------------------------------------------------------------------------------------------------------------------|-------------------------------------------------------------------------------------|--|--|--|--|--|--|
|    | society, committee or advocacy group, paid or unpaid                             | <table border="1"> <tr><td></td><td></td></tr> <tr><td></td><td></td></tr> </table>                                                                      |                                                                                     |  |  |  |  |  |  |
|    |                                                                                  |                                                                                                                                                          |                                                                                     |  |  |  |  |  |  |
|    |                                                                                  |                                                                                                                                                          |                                                                                     |  |  |  |  |  |  |
| 11 | Stock or stock options                                                           | <input checked="" type="checkbox"/> None <table border="1"> <tr><td></td><td></td></tr> <tr><td></td><td></td></tr> <tr><td></td><td></td></tr> </table> |                                                                                     |  |  |  |  |  |  |
|    |                                                                                  |                                                                                                                                                          |                                                                                     |  |  |  |  |  |  |
|    |                                                                                  |                                                                                                                                                          |                                                                                     |  |  |  |  |  |  |
|    |                                                                                  |                                                                                                                                                          |                                                                                     |  |  |  |  |  |  |
| 12 | Receipt of equipment, materials, drugs, medical writing, gifts or other services | <input checked="" type="checkbox"/> None <table border="1"> <tr><td></td><td></td></tr> <tr><td></td><td></td></tr> <tr><td></td><td></td></tr> </table> |                                                                                     |  |  |  |  |  |  |
|    |                                                                                  |                                                                                                                                                          |                                                                                     |  |  |  |  |  |  |
|    |                                                                                  |                                                                                                                                                          |                                                                                     |  |  |  |  |  |  |
|    |                                                                                  |                                                                                                                                                          |                                                                                     |  |  |  |  |  |  |
| 13 | Other financial or non-financial interests                                       | <input checked="" type="checkbox"/> None <table border="1"> <tr><td></td><td></td></tr> <tr><td></td><td></td></tr> <tr><td></td><td></td></tr> </table> |                                                                                     |  |  |  |  |  |  |
|    |                                                                                  |                                                                                                                                                          |                                                                                     |  |  |  |  |  |  |
|    |                                                                                  |                                                                                                                                                          |                                                                                     |  |  |  |  |  |  |
|    |                                                                                  |                                                                                                                                                          |                                                                                     |  |  |  |  |  |  |

**Please place an "X" next to the following statement to indicate your agreement:**

☒ I certify that I have answered every question and have not altered the wording of any of the questions on this form.

# ICMJE DISCLOSURE FORM

**Date:** 12/4/2024

**Your Name:** Claus Storgaard Sørensen

**Manuscript Title:** Facilitating clinical classification of variants in the PALB2 binding domain of BRCA2 using CRISPR-Select

**Manuscript Number (if known):** 181879-JCI-CMED-1

In the interest of transparency, we ask you to disclose all relationships/activities/interests listed below that are related to the content of your manuscript. "Related" means any relation with for-profit or not-for-profit third parties whose interests may be affected by the content of the manuscript. Disclosure represents a commitment to transparency and does not necessarily indicate a bias. If you are in doubt about whether to list a relationship/activity/interest, it is preferable that you do so.

The author's relationships/activities/interests should be defined broadly. For example, if your manuscript pertains to the epidemiology of hypertension, you should declare all relationships with manufacturers of antihypertensive medication, even if that medication is not mentioned in the manuscript.

In item #1 below, report all support for the work reported in this manuscript without time limit. For all other items, the time frame for disclosure is the past 36 months.

|                                                           | Name all entities with whom you have this relationship or indicate none (add rows as needed)                                                                                                                                                                                                                                                                                                                                                               | Specifications/Comments (e.g., if payments were made to you or to your institution) |                                                                                                              |                                    |                                                                                               |                                           |  |  |
|-----------------------------------------------------------|------------------------------------------------------------------------------------------------------------------------------------------------------------------------------------------------------------------------------------------------------------------------------------------------------------------------------------------------------------------------------------------------------------------------------------------------------------|-------------------------------------------------------------------------------------|--------------------------------------------------------------------------------------------------------------|------------------------------------|-----------------------------------------------------------------------------------------------|-------------------------------------------|--|--|
| <b>Time frame: Since the initial planning of the work</b> |                                                                                                                                                                                                                                                                                                                                                                                                                                                            |                                                                                     |                                                                                                              |                                    |                                                                                               |                                           |  |  |
| <b>1</b>                                                  | All support for the present manuscript (e.g., funding, provision of study materials, medical writing, article processing charges, etc.)<br><b>No time limit for this item.</b>                                                                                                                                                                                                                                                                             | <input type="checkbox"/> <b>None</b>                                                |                                                                                                              |                                    |                                                                                               |                                           |  |  |
|                                                           | <table border="1"> <tr> <td>Sygeforsikringen Danmark (Danish Foundation)</td> <td>Grant number J.nr: 2021-0339. This is to support the development of functional assays to classify BRCA2 VUS.</td> </tr> <tr> <td>Lundbeckfonden (Danish Foundation)</td> <td>Grant number J.nr R223-2016-8, "Unravelling the genetic background of familial breast cancer"</td> </tr> <tr> <td colspan="2">Click the tab key to add additional rows.</td> </tr> </table> | Sygeforsikringen Danmark (Danish Foundation)                                        | Grant number J.nr: 2021-0339. This is to support the development of functional assays to classify BRCA2 VUS. | Lundbeckfonden (Danish Foundation) | Grant number J.nr R223-2016-8, "Unravelling the genetic background of familial breast cancer" | Click the tab key to add additional rows. |  |  |
| Sygeforsikringen Danmark (Danish Foundation)              | Grant number J.nr: 2021-0339. This is to support the development of functional assays to classify BRCA2 VUS.                                                                                                                                                                                                                                                                                                                                               |                                                                                     |                                                                                                              |                                    |                                                                                               |                                           |  |  |
| Lundbeckfonden (Danish Foundation)                        | Grant number J.nr R223-2016-8, "Unravelling the genetic background of familial breast cancer"                                                                                                                                                                                                                                                                                                                                                              |                                                                                     |                                                                                                              |                                    |                                                                                               |                                           |  |  |
| Click the tab key to add additional rows.                 |                                                                                                                                                                                                                                                                                                                                                                                                                                                            |                                                                                     |                                                                                                              |                                    |                                                                                               |                                           |  |  |
| <b>Time frame: past 36 months</b>                         |                                                                                                                                                                                                                                                                                                                                                                                                                                                            |                                                                                     |                                                                                                              |                                    |                                                                                               |                                           |  |  |
| <b>2</b>                                                  | Grants or contracts from any entity (if not indicated in item #1 above).                                                                                                                                                                                                                                                                                                                                                                                   | <input checked="" type="checkbox"/> <b>None</b>                                     |                                                                                                              |                                    |                                                                                               |                                           |  |  |
|                                                           | <table border="1"> <tr><td></td><td></td></tr> <tr><td></td><td></td></tr> <tr><td></td><td></td></tr> </table>                                                                                                                                                                                                                                                                                                                                            |                                                                                     |                                                                                                              |                                    |                                                                                               |                                           |  |  |
|                                                           |                                                                                                                                                                                                                                                                                                                                                                                                                                                            |                                                                                     |                                                                                                              |                                    |                                                                                               |                                           |  |  |
|                                                           |                                                                                                                                                                                                                                                                                                                                                                                                                                                            |                                                                                     |                                                                                                              |                                    |                                                                                               |                                           |  |  |
|                                                           |                                                                                                                                                                                                                                                                                                                                                                                                                                                            |                                                                                     |                                                                                                              |                                    |                                                                                               |                                           |  |  |
| <b>3</b>                                                  | Royalties or licenses                                                                                                                                                                                                                                                                                                                                                                                                                                      | <input checked="" type="checkbox"/> <b>None</b>                                     |                                                                                                              |                                    |                                                                                               |                                           |  |  |
|                                                           | <table border="1"> <tr><td></td><td></td></tr> <tr><td></td><td></td></tr> <tr><td></td><td></td></tr> </table>                                                                                                                                                                                                                                                                                                                                            |                                                                                     |                                                                                                              |                                    |                                                                                               |                                           |  |  |
|                                                           |                                                                                                                                                                                                                                                                                                                                                                                                                                                            |                                                                                     |                                                                                                              |                                    |                                                                                               |                                           |  |  |
|                                                           |                                                                                                                                                                                                                                                                                                                                                                                                                                                            |                                                                                     |                                                                                                              |                                    |                                                                                               |                                           |  |  |
|                                                           |                                                                                                                                                                                                                                                                                                                                                                                                                                                            |                                                                                     |                                                                                                              |                                    |                                                                                               |                                           |  |  |

|                                                                                                                                         |                                                                                                                                        | Name all entities with whom you have this relationship or indicate none (add rows as needed)                                                                                                                                                                                                                                                                                                                                            | Specifications/Comments (e.g., if payments were made to you or to your institution) |                                                                                                                                         |                                                                                                                                        |  |  |  |  |  |  |
|-----------------------------------------------------------------------------------------------------------------------------------------|----------------------------------------------------------------------------------------------------------------------------------------|-----------------------------------------------------------------------------------------------------------------------------------------------------------------------------------------------------------------------------------------------------------------------------------------------------------------------------------------------------------------------------------------------------------------------------------------|-------------------------------------------------------------------------------------|-----------------------------------------------------------------------------------------------------------------------------------------|----------------------------------------------------------------------------------------------------------------------------------------|--|--|--|--|--|--|
| 4                                                                                                                                       | Consulting fees                                                                                                                        | <input checked="" type="checkbox"/> <b>None</b><br><table border="1"> <tr><td></td><td></td></tr> <tr><td></td><td></td></tr> <tr><td></td><td></td></tr> <tr><td></td><td></td></tr> </table>                                                                                                                                                                                                                                          |                                                                                     |                                                                                                                                         |                                                                                                                                        |  |  |  |  |  |  |
|                                                                                                                                         |                                                                                                                                        |                                                                                                                                                                                                                                                                                                                                                                                                                                         |                                                                                     |                                                                                                                                         |                                                                                                                                        |  |  |  |  |  |  |
|                                                                                                                                         |                                                                                                                                        |                                                                                                                                                                                                                                                                                                                                                                                                                                         |                                                                                     |                                                                                                                                         |                                                                                                                                        |  |  |  |  |  |  |
|                                                                                                                                         |                                                                                                                                        |                                                                                                                                                                                                                                                                                                                                                                                                                                         |                                                                                     |                                                                                                                                         |                                                                                                                                        |  |  |  |  |  |  |
|                                                                                                                                         |                                                                                                                                        |                                                                                                                                                                                                                                                                                                                                                                                                                                         |                                                                                     |                                                                                                                                         |                                                                                                                                        |  |  |  |  |  |  |
| 5                                                                                                                                       | Payment or honoraria for lectures, presentations, speakers bureaus, manuscript writing or educational events                           | <input checked="" type="checkbox"/> <b>None</b><br><table border="1"> <tr><td></td><td></td></tr> <tr><td></td><td></td></tr> <tr><td></td><td></td></tr> </table>                                                                                                                                                                                                                                                                      |                                                                                     |                                                                                                                                         |                                                                                                                                        |  |  |  |  |  |  |
|                                                                                                                                         |                                                                                                                                        |                                                                                                                                                                                                                                                                                                                                                                                                                                         |                                                                                     |                                                                                                                                         |                                                                                                                                        |  |  |  |  |  |  |
|                                                                                                                                         |                                                                                                                                        |                                                                                                                                                                                                                                                                                                                                                                                                                                         |                                                                                     |                                                                                                                                         |                                                                                                                                        |  |  |  |  |  |  |
|                                                                                                                                         |                                                                                                                                        |                                                                                                                                                                                                                                                                                                                                                                                                                                         |                                                                                     |                                                                                                                                         |                                                                                                                                        |  |  |  |  |  |  |
| 6                                                                                                                                       | Payment for expert testimony                                                                                                           | <input checked="" type="checkbox"/> <b>None</b><br><table border="1"> <tr><td></td><td></td></tr> <tr><td></td><td></td></tr> <tr><td></td><td></td></tr> </table>                                                                                                                                                                                                                                                                      |                                                                                     |                                                                                                                                         |                                                                                                                                        |  |  |  |  |  |  |
|                                                                                                                                         |                                                                                                                                        |                                                                                                                                                                                                                                                                                                                                                                                                                                         |                                                                                     |                                                                                                                                         |                                                                                                                                        |  |  |  |  |  |  |
|                                                                                                                                         |                                                                                                                                        |                                                                                                                                                                                                                                                                                                                                                                                                                                         |                                                                                     |                                                                                                                                         |                                                                                                                                        |  |  |  |  |  |  |
|                                                                                                                                         |                                                                                                                                        |                                                                                                                                                                                                                                                                                                                                                                                                                                         |                                                                                     |                                                                                                                                         |                                                                                                                                        |  |  |  |  |  |  |
| 7                                                                                                                                       | Support for attending meetings and/or travel                                                                                           | <input checked="" type="checkbox"/> <b>None</b><br><table border="1"> <tr><td></td><td></td></tr> <tr><td></td><td></td></tr> <tr><td></td><td></td></tr> </table>                                                                                                                                                                                                                                                                      |                                                                                     |                                                                                                                                         |                                                                                                                                        |  |  |  |  |  |  |
|                                                                                                                                         |                                                                                                                                        |                                                                                                                                                                                                                                                                                                                                                                                                                                         |                                                                                     |                                                                                                                                         |                                                                                                                                        |  |  |  |  |  |  |
|                                                                                                                                         |                                                                                                                                        |                                                                                                                                                                                                                                                                                                                                                                                                                                         |                                                                                     |                                                                                                                                         |                                                                                                                                        |  |  |  |  |  |  |
|                                                                                                                                         |                                                                                                                                        |                                                                                                                                                                                                                                                                                                                                                                                                                                         |                                                                                     |                                                                                                                                         |                                                                                                                                        |  |  |  |  |  |  |
| 8                                                                                                                                       | Patents planned, issued or pending                                                                                                     | <input type="checkbox"/> <b>None</b><br><table border="1"> <tr> <td>I am part of the European patent application on "CRISPR-Select" (application no. 21816113.1) submitted by the University of Copenhagen.</td> <td>The patent is owned by the University of Copenhagen and it has been licensed to BioPhenyx (where I am co-founder and 33% shareholder).</td> </tr> <tr><td></td><td></td></tr> <tr><td></td><td></td></tr> </table> |                                                                                     | I am part of the European patent application on "CRISPR-Select" (application no. 21816113.1) submitted by the University of Copenhagen. | The patent is owned by the University of Copenhagen and it has been licensed to BioPhenyx (where I am co-founder and 33% shareholder). |  |  |  |  |  |  |
| I am part of the European patent application on "CRISPR-Select" (application no. 21816113.1) submitted by the University of Copenhagen. | The patent is owned by the University of Copenhagen and it has been licensed to BioPhenyx (where I am co-founder and 33% shareholder). |                                                                                                                                                                                                                                                                                                                                                                                                                                         |                                                                                     |                                                                                                                                         |                                                                                                                                        |  |  |  |  |  |  |
|                                                                                                                                         |                                                                                                                                        |                                                                                                                                                                                                                                                                                                                                                                                                                                         |                                                                                     |                                                                                                                                         |                                                                                                                                        |  |  |  |  |  |  |
|                                                                                                                                         |                                                                                                                                        |                                                                                                                                                                                                                                                                                                                                                                                                                                         |                                                                                     |                                                                                                                                         |                                                                                                                                        |  |  |  |  |  |  |
| 9                                                                                                                                       | Participation on a Data Safety Monitoring Board or Advisory Board                                                                      | <input checked="" type="checkbox"/> <b>None</b><br><table border="1"> <tr><td></td><td></td></tr> <tr><td></td><td></td></tr> <tr><td></td><td></td></tr> </table>                                                                                                                                                                                                                                                                      |                                                                                     |                                                                                                                                         |                                                                                                                                        |  |  |  |  |  |  |
|                                                                                                                                         |                                                                                                                                        |                                                                                                                                                                                                                                                                                                                                                                                                                                         |                                                                                     |                                                                                                                                         |                                                                                                                                        |  |  |  |  |  |  |
|                                                                                                                                         |                                                                                                                                        |                                                                                                                                                                                                                                                                                                                                                                                                                                         |                                                                                     |                                                                                                                                         |                                                                                                                                        |  |  |  |  |  |  |
|                                                                                                                                         |                                                                                                                                        |                                                                                                                                                                                                                                                                                                                                                                                                                                         |                                                                                     |                                                                                                                                         |                                                                                                                                        |  |  |  |  |  |  |
| 10                                                                                                                                      | Leadership or fiduciary role in other board, society, committee or advocacy group, paid or unpaid                                      | <input type="checkbox"/> <b>None</b><br><table border="1"> <tr> <td>Danish Cancer Society Scientific Committee</td> <td>I have served in the committee (2018-24) which is a major Danish foundation that provides grants to cancer research.</td> </tr> <tr><td></td><td></td></tr> <tr><td></td><td></td></tr> </table>                                                                                                                |                                                                                     | Danish Cancer Society Scientific Committee                                                                                              | I have served in the committee (2018-24) which is a major Danish foundation that provides grants to cancer research.                   |  |  |  |  |  |  |
| Danish Cancer Society Scientific Committee                                                                                              | I have served in the committee (2018-24) which is a major Danish foundation that provides grants to cancer research.                   |                                                                                                                                                                                                                                                                                                                                                                                                                                         |                                                                                     |                                                                                                                                         |                                                                                                                                        |  |  |  |  |  |  |
|                                                                                                                                         |                                                                                                                                        |                                                                                                                                                                                                                                                                                                                                                                                                                                         |                                                                                     |                                                                                                                                         |                                                                                                                                        |  |  |  |  |  |  |
|                                                                                                                                         |                                                                                                                                        |                                                                                                                                                                                                                                                                                                                                                                                                                                         |                                                                                     |                                                                                                                                         |                                                                                                                                        |  |  |  |  |  |  |

|    |                                                                                  | Name all entities with whom you have this relationship or indicate none (add rows as needed)                                                                                                                                                                                                                                                                                                                                                                           | Specifications/Comments (e.g., if payments were made to you or to your institution) |
|----|----------------------------------------------------------------------------------|------------------------------------------------------------------------------------------------------------------------------------------------------------------------------------------------------------------------------------------------------------------------------------------------------------------------------------------------------------------------------------------------------------------------------------------------------------------------|-------------------------------------------------------------------------------------|
| 11 | Stock or stock options                                                           | <input type="checkbox"/> None<br><div> <div>BioPhenyx Aps. Danish Company Registration number: 42954810</div> <div>I co-founded the company that uses CRISPR-Select to serve customers in the private sector (Pharma and Biotech) with CRISPR-Select. I (and my department, BRIC) have never received payments from the company. The company does not provide diagnostic services or decode cancer-related variants for private and healthcare customers.</div> </div> |                                                                                     |
| 12 | Receipt of equipment, materials, drugs, medical writing, gifts or other services | <input checked="" type="checkbox"/> None<br><div> <div></div> <div></div> </div>                                                                                                                                                                                                                                                                                                                                                                                       |                                                                                     |
| 13 | Other financial or non-financial interests                                       | <input checked="" type="checkbox"/> None<br><div> <div></div> <div></div> </div>                                                                                                                                                                                                                                                                                                                                                                                       |                                                                                     |

**Please place an "X" next to the following statement to indicate your agreement:**

☒ I certify that I have answered every question and have not altered the wording of any of the questions on this form.

# ICMJE DISCLOSURE FORM

**Date:** 12/10/2024

**Your Name:** Maria Rossing

**Manuscript Title:** Facilitating clinical classification of variants in the PALB2 binding domain of BRCA2 using CRISPR-Select

**Manuscript Number (if known):** 181879-JCI-CMED-1

In the interest of transparency, we ask you to disclose all relationships/activities/interests listed below that are related to the content of your manuscript. "Related" means any relation with for-profit or not-for-profit third parties whose interests may be affected by the content of the manuscript. Disclosure represents a commitment to transparency and does not necessarily indicate a bias. If you are in doubt about whether to list a relationship/activity/interest, it is preferable that you do so.

The author's relationships/activities/interests should be defined broadly. For example, if your manuscript pertains to the epidemiology of hypertension, you should declare all relationships with manufacturers of antihypertensive medication, even if that medication is not mentioned in the manuscript.

In item #1 below, report all support for the work reported in this manuscript without time limit. For all other items, the time frame for disclosure is the past 36 months.

|                                                           | Name all entities with whom you have this relationship or indicate none (add rows as needed)                                                                                                                                                                                                                                                                                                                                                                                                                                                                  | Specifications/Comments (e.g., if payments were made to you or to your institution) |                                                                                                             |                                 |                                        |                       |                                           |  |
|-----------------------------------------------------------|---------------------------------------------------------------------------------------------------------------------------------------------------------------------------------------------------------------------------------------------------------------------------------------------------------------------------------------------------------------------------------------------------------------------------------------------------------------------------------------------------------------------------------------------------------------|-------------------------------------------------------------------------------------|-------------------------------------------------------------------------------------------------------------|---------------------------------|----------------------------------------|-----------------------|-------------------------------------------|--|
| <b>Time frame: Since the initial planning of the work</b> |                                                                                                                                                                                                                                                                                                                                                                                                                                                                                                                                                               |                                                                                     |                                                                                                             |                                 |                                        |                       |                                           |  |
| <b>1</b>                                                  | <div> <div>All support for the present manuscript (e.g., funding, provision of study materials, medical writing, article processing charges, etc.)<br/><b>No time limit for this item.</b></div> <div> <input type="checkbox"/> <b>None</b> </div> <table border="1"> <tr> <td>Novo Nordisk Foundation</td> <td>Grant number J.nr: NNF21OC0072287. To facilitate the identification of novel hereditary breast cancer genes</td> </tr> <tr> <td></td> <td></td> </tr> <tr> <td></td> <td>Click the tab key to add additional rows.</td> </tr> </table> </div> | Novo Nordisk Foundation                                                             | Grant number J.nr: NNF21OC0072287. To facilitate the identification of novel hereditary breast cancer genes |                                 |                                        |                       | Click the tab key to add additional rows. |  |
| Novo Nordisk Foundation                                   | Grant number J.nr: NNF21OC0072287. To facilitate the identification of novel hereditary breast cancer genes                                                                                                                                                                                                                                                                                                                                                                                                                                                   |                                                                                     |                                                                                                             |                                 |                                        |                       |                                           |  |
|                                                           |                                                                                                                                                                                                                                                                                                                                                                                                                                                                                                                                                               |                                                                                     |                                                                                                             |                                 |                                        |                       |                                           |  |
|                                                           | Click the tab key to add additional rows.                                                                                                                                                                                                                                                                                                                                                                                                                                                                                                                     |                                                                                     |                                                                                                             |                                 |                                        |                       |                                           |  |
| <b>Time frame: past 36 months</b>                         |                                                                                                                                                                                                                                                                                                                                                                                                                                                                                                                                                               |                                                                                     |                                                                                                             |                                 |                                        |                       |                                           |  |
| <b>2</b>                                                  | <div> <div>Grants or contracts from any entity (if not indicated in item #1 above).</div> <div> <input type="checkbox"/> <b>None</b> </div> <table border="1"> <tr> <td>Dietmar Hopp Stiftung GmbH</td> <td>Research Funding (Paid to institution)</td> </tr> <tr> <td>Neye-Fonden (Danish Foundation)</td> <td>Research Funding (Paid to institution)</td> </tr> <tr> <td>Danish Cancer Society</td> <td>Research Funding (Paid to institution)</td> </tr> </table> </div>                                                                                   | Dietmar Hopp Stiftung GmbH                                                          | Research Funding (Paid to institution)                                                                      | Neye-Fonden (Danish Foundation) | Research Funding (Paid to institution) | Danish Cancer Society | Research Funding (Paid to institution)    |  |
| Dietmar Hopp Stiftung GmbH                                | Research Funding (Paid to institution)                                                                                                                                                                                                                                                                                                                                                                                                                                                                                                                        |                                                                                     |                                                                                                             |                                 |                                        |                       |                                           |  |
| Neye-Fonden (Danish Foundation)                           | Research Funding (Paid to institution)                                                                                                                                                                                                                                                                                                                                                                                                                                                                                                                        |                                                                                     |                                                                                                             |                                 |                                        |                       |                                           |  |
| Danish Cancer Society                                     | Research Funding (Paid to institution)                                                                                                                                                                                                                                                                                                                                                                                                                                                                                                                        |                                                                                     |                                                                                                             |                                 |                                        |                       |                                           |  |
| <b>3</b>                                                  | <div> <div>Royalties or licenses</div> <div> <input checked="" type="checkbox"/> <b>None</b> </div> <table border="1"> <tr> <td></td> <td></td> </tr> <tr> <td></td> <td></td> </tr> <tr> <td></td> <td></td> </tr> </table> </div>                                                                                                                                                                                                                                                                                                                           |                                                                                     |                                                                                                             |                                 |                                        |                       |                                           |  |
|                                                           |                                                                                                                                                                                                                                                                                                                                                                                                                                                                                                                                                               |                                                                                     |                                                                                                             |                                 |                                        |                       |                                           |  |
|                                                           |                                                                                                                                                                                                                                                                                                                                                                                                                                                                                                                                                               |                                                                                     |                                                                                                             |                                 |                                        |                       |                                           |  |
|                                                           |                                                                                                                                                                                                                                                                                                                                                                                                                                                                                                                                                               |                                                                                     |                                                                                                             |                                 |                                        |                       |                                           |  |



|             |                                                                                                              | Name all entities with whom you have this relationship or indicate none (add rows as needed)                                                                                                                                                                           | Specifications/Comments (e.g., if payments were made to you or to your institution) |             |                                       |  |  |  |  |  |  |
|-------------|--------------------------------------------------------------------------------------------------------------|------------------------------------------------------------------------------------------------------------------------------------------------------------------------------------------------------------------------------------------------------------------------|-------------------------------------------------------------------------------------|-------------|---------------------------------------|--|--|--|--|--|--|
| 4           | Consulting fees                                                                                              | <input type="checkbox"/> <b>None</b> <table border="1" data-bbox="386 258 1516 394"> <tr> <td>AstraZeneca</td> <td>The payments were made to me directly</td> </tr> <tr><td> </td><td> </td></tr> <tr><td> </td><td> </td></tr> <tr><td> </td><td> </td></tr> </table> |                                                                                     | AstraZeneca | The payments were made to me directly |  |  |  |  |  |  |
| AstraZeneca | The payments were made to me directly                                                                        |                                                                                                                                                                                                                                                                        |                                                                                     |             |                                       |  |  |  |  |  |  |
|             |                                                                                                              |                                                                                                                                                                                                                                                                        |                                                                                     |             |                                       |  |  |  |  |  |  |
|             |                                                                                                              |                                                                                                                                                                                                                                                                        |                                                                                     |             |                                       |  |  |  |  |  |  |
|             |                                                                                                              |                                                                                                                                                                                                                                                                        |                                                                                     |             |                                       |  |  |  |  |  |  |
| 5           | Payment or honoraria for lectures, presentations, speakers bureaus, manuscript writing or educational events | <input checked="" type="checkbox"/> <b>None</b> <table border="1" data-bbox="386 480 1516 583"> <tr><td> </td><td> </td></tr> <tr><td> </td><td> </td></tr> <tr><td> </td><td> </td></tr> </table>                                                                     |                                                                                     |             |                                       |  |  |  |  |  |  |
|             |                                                                                                              |                                                                                                                                                                                                                                                                        |                                                                                     |             |                                       |  |  |  |  |  |  |
|             |                                                                                                              |                                                                                                                                                                                                                                                                        |                                                                                     |             |                                       |  |  |  |  |  |  |
|             |                                                                                                              |                                                                                                                                                                                                                                                                        |                                                                                     |             |                                       |  |  |  |  |  |  |
| 6           | Payment for expert testimony                                                                                 | <input checked="" type="checkbox"/> <b>None</b> <table border="1" data-bbox="386 825 1516 928"> <tr><td> </td><td> </td></tr> <tr><td> </td><td> </td></tr> <tr><td> </td><td> </td></tr> </table>                                                                     |                                                                                     |             |                                       |  |  |  |  |  |  |
|             |                                                                                                              |                                                                                                                                                                                                                                                                        |                                                                                     |             |                                       |  |  |  |  |  |  |
|             |                                                                                                              |                                                                                                                                                                                                                                                                        |                                                                                     |             |                                       |  |  |  |  |  |  |
|             |                                                                                                              |                                                                                                                                                                                                                                                                        |                                                                                     |             |                                       |  |  |  |  |  |  |
| 7           | Support for attending meetings and/or travel                                                                 | <input checked="" type="checkbox"/> <b>None</b> <table border="1" data-bbox="386 1041 1516 1144"> <tr><td> </td><td> </td></tr> <tr><td> </td><td> </td></tr> <tr><td> </td><td> </td></tr> </table>                                                                   |                                                                                     |             |                                       |  |  |  |  |  |  |
|             |                                                                                                              |                                                                                                                                                                                                                                                                        |                                                                                     |             |                                       |  |  |  |  |  |  |
|             |                                                                                                              |                                                                                                                                                                                                                                                                        |                                                                                     |             |                                       |  |  |  |  |  |  |
|             |                                                                                                              |                                                                                                                                                                                                                                                                        |                                                                                     |             |                                       |  |  |  |  |  |  |
| 8           | Patents planned, issued or pending                                                                           | <input checked="" type="checkbox"/> <b>None</b> <table border="1" data-bbox="386 1257 1516 1360"> <tr><td> </td><td> </td></tr> <tr><td> </td><td> </td></tr> <tr><td> </td><td> </td></tr> </table>                                                                   |                                                                                     |             |                                       |  |  |  |  |  |  |
|             |                                                                                                              |                                                                                                                                                                                                                                                                        |                                                                                     |             |                                       |  |  |  |  |  |  |
|             |                                                                                                              |                                                                                                                                                                                                                                                                        |                                                                                     |             |                                       |  |  |  |  |  |  |
|             |                                                                                                              |                                                                                                                                                                                                                                                                        |                                                                                     |             |                                       |  |  |  |  |  |  |
| 9           | Participation on a Data Safety Monitoring Board or Advisory Board                                            | <input checked="" type="checkbox"/> <b>None</b> <table border="1" data-bbox="386 1474 1516 1577"> <tr><td> </td><td> </td></tr> <tr><td> </td><td> </td></tr> <tr><td> </td><td> </td></tr> </table>                                                                   |                                                                                     |             |                                       |  |  |  |  |  |  |
|             |                                                                                                              |                                                                                                                                                                                                                                                                        |                                                                                     |             |                                       |  |  |  |  |  |  |
|             |                                                                                                              |                                                                                                                                                                                                                                                                        |                                                                                     |             |                                       |  |  |  |  |  |  |
|             |                                                                                                              |                                                                                                                                                                                                                                                                        |                                                                                     |             |                                       |  |  |  |  |  |  |
| 10          | Leadership or fiduciary role in other board, society, committee or advocacy group, paid or unpaid            | <input checked="" type="checkbox"/> <b>None</b> <table border="1" data-bbox="386 1665 1516 1768"> <tr><td> </td><td> </td></tr> <tr><td> </td><td> </td></tr> <tr><td> </td><td> </td></tr> </table>                                                                   |                                                                                     |             |                                       |  |  |  |  |  |  |
|             |                                                                                                              |                                                                                                                                                                                                                                                                        |                                                                                     |             |                                       |  |  |  |  |  |  |
|             |                                                                                                              |                                                                                                                                                                                                                                                                        |                                                                                     |             |                                       |  |  |  |  |  |  |
|             |                                                                                                              |                                                                                                                                                                                                                                                                        |                                                                                     |             |                                       |  |  |  |  |  |  |

|           |                                                                                  | Name all entities with whom you have this relationship or indicate none (add rows as needed)                                                                                                          | Specifications/Comments (e.g., if payments were made to you or to your institution) |  |  |  |  |  |  |
|-----------|----------------------------------------------------------------------------------|-------------------------------------------------------------------------------------------------------------------------------------------------------------------------------------------------------|-------------------------------------------------------------------------------------|--|--|--|--|--|--|
| <b>11</b> | Stock or stock options                                                           | <input checked="" type="checkbox"/> <b>None</b> <table border="1" style="width: 100%; margin-top: 5px;"> <tr><td></td><td></td></tr> <tr><td></td><td></td></tr> <tr><td></td><td></td></tr> </table> |                                                                                     |  |  |  |  |  |  |
|           |                                                                                  |                                                                                                                                                                                                       |                                                                                     |  |  |  |  |  |  |
|           |                                                                                  |                                                                                                                                                                                                       |                                                                                     |  |  |  |  |  |  |
|           |                                                                                  |                                                                                                                                                                                                       |                                                                                     |  |  |  |  |  |  |
| <b>12</b> | Receipt of equipment, materials, drugs, medical writing, gifts or other services | <input checked="" type="checkbox"/> <b>None</b> <table border="1" style="width: 100%; margin-top: 5px;"> <tr><td></td><td></td></tr> <tr><td></td><td></td></tr> <tr><td></td><td></td></tr> </table> |                                                                                     |  |  |  |  |  |  |
|           |                                                                                  |                                                                                                                                                                                                       |                                                                                     |  |  |  |  |  |  |
|           |                                                                                  |                                                                                                                                                                                                       |                                                                                     |  |  |  |  |  |  |
|           |                                                                                  |                                                                                                                                                                                                       |                                                                                     |  |  |  |  |  |  |
| <b>13</b> | Other financial or non-financial interests                                       | <input checked="" type="checkbox"/> <b>None</b> <table border="1" style="width: 100%; margin-top: 5px;"> <tr><td></td><td></td></tr> <tr><td></td><td></td></tr> <tr><td></td><td></td></tr> </table> |                                                                                     |  |  |  |  |  |  |
|           |                                                                                  |                                                                                                                                                                                                       |                                                                                     |  |  |  |  |  |  |
|           |                                                                                  |                                                                                                                                                                                                       |                                                                                     |  |  |  |  |  |  |
|           |                                                                                  |                                                                                                                                                                                                       |                                                                                     |  |  |  |  |  |  |

**Please place an "X" next to the following statement to indicate your agreement:**

☒ I certify that I have answered every question and have not altered the wording of any of the questions on this form.
