# Supplementary material for: Precision screening facilitates clinical classification of BRCA2-PALB2 binding variants with benign and pathogenic functional effects
Source: JCI journal article supplement (doi:10.1172/jci181879), 2025-04-15

Full unedited blot/gel for Figure 4C

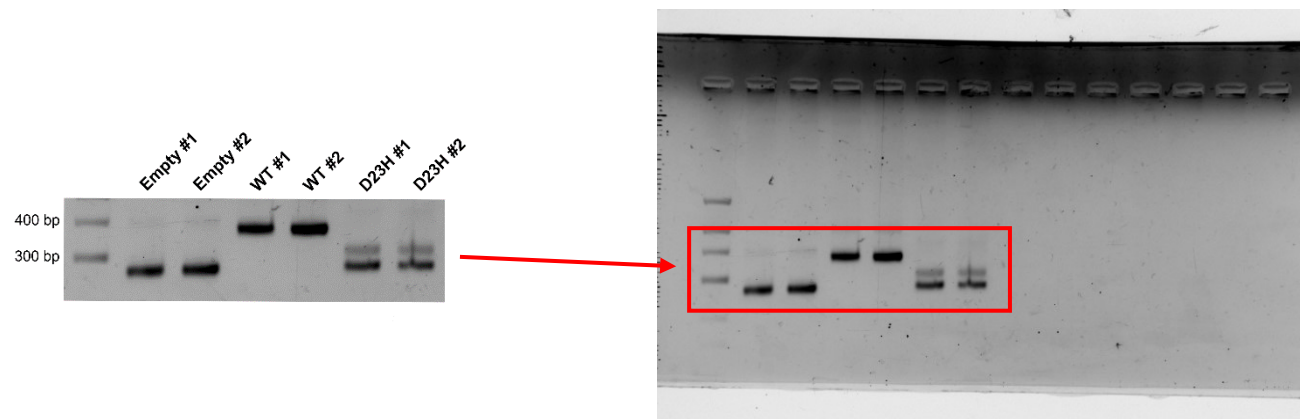

Full unedited blot/gel for Figure S1D

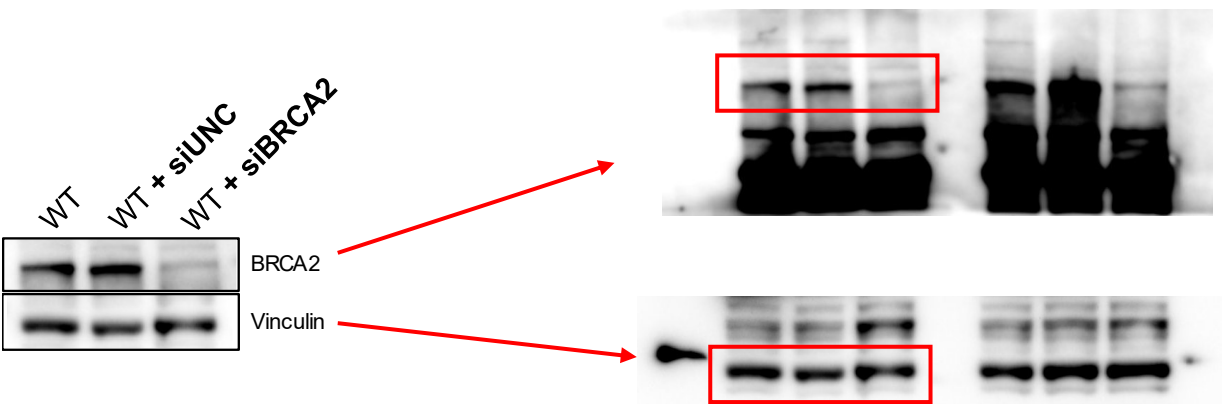

Supplement: sd3 [file 3]
